# Supplementary material for: Direct One-Step Growth of Bimetallic Ni2Mo3N on Ni Foam as an Efficient Oxygen Evolution Electrocatalyst
Source: MDPI journal article supplement (doi:10.3390/ma14164768), 2021-08-23
Supplement: s1 [file s1]

# Direct One-Step Growth of Bimetallic $\text{Ni}_2\text{Mo}_3\text{N}$ on Ni Foam as an Efficient Oxygen Evolution Electrocatalyst

Sang Heon Park <sup>1</sup>, Soon Hyung Kang <sup>2,\*</sup> and Duck Hyun Youn <sup>1,\*</sup>

<sup>1</sup> Department of Chemical Engineering, Interdisciplinary Program in Advanced Functional Materials and Devices Development, Kangwon National University, Chuncheon 24341, Korea; parksh31@kangwon.ac.kr

<sup>2</sup> Department of Chemistry Education, Chonnam National University, Gwangju 61186, Korea

\* Correspondence: skang@jnu.ac.kr (S.H.K.); youndh@kangwon.ac.kr (D.H.Y.)

**Citation:** Park, S.H.; Kang, S.H.; Youn, D.H. Direct One-Step Growth of Bimetallic  $\text{Ni}_2\text{Mo}_3\text{N}$  on Ni Foam as an Efficient Oxygen Evolution Electrocatalyst. *Materials* **2021**, *14*, 4768. <https://doi.org/10.3390/ma14164768>

Academic Editor: Ivano E. Castelli

Received: 28 June 2021

Accepted: 19 August 2021

Published: 23 August 2021

**Publisher's Note:** MDPI stays neutral with regard to jurisdictional claims in published maps and institutional affiliations.

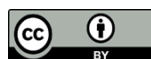

**Copyright:** © 2021 by the authors. Licensee MDPI, Basel, Switzerland. This article is an open access article distributed under the terms and conditions of the Creative Commons Attribution (CC BY) license (<http://creativecommons.org/licenses/by/4.0/>).

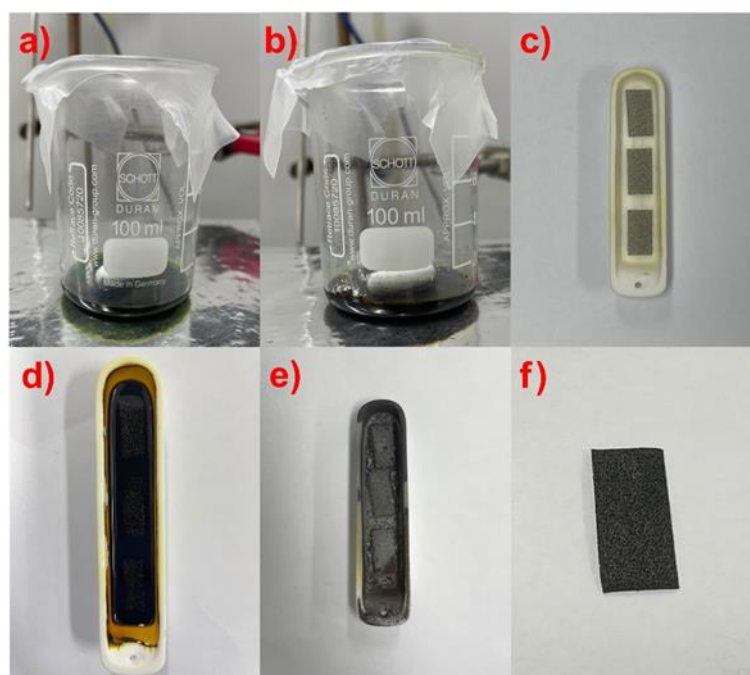

**Figure S1.** Digital photographs for the synthetic procedure: (a)  $\text{MoCl}_5$  was dissolved in ethanol to form a dark-greenish solution; (b) The addition of urea to the solution yielded a viscous Mo-urea complex; (c,d) Ni foams and Mo-urea complex were transferred to an alumina boat and annealed at 600 °C for 3 h under  $\text{N}_2$  flow; (e,f) Consequently,  $\text{Ni}_2\text{Mo}_3\text{N}$  nanoparticles grown directly on nickel foam were fabricated.

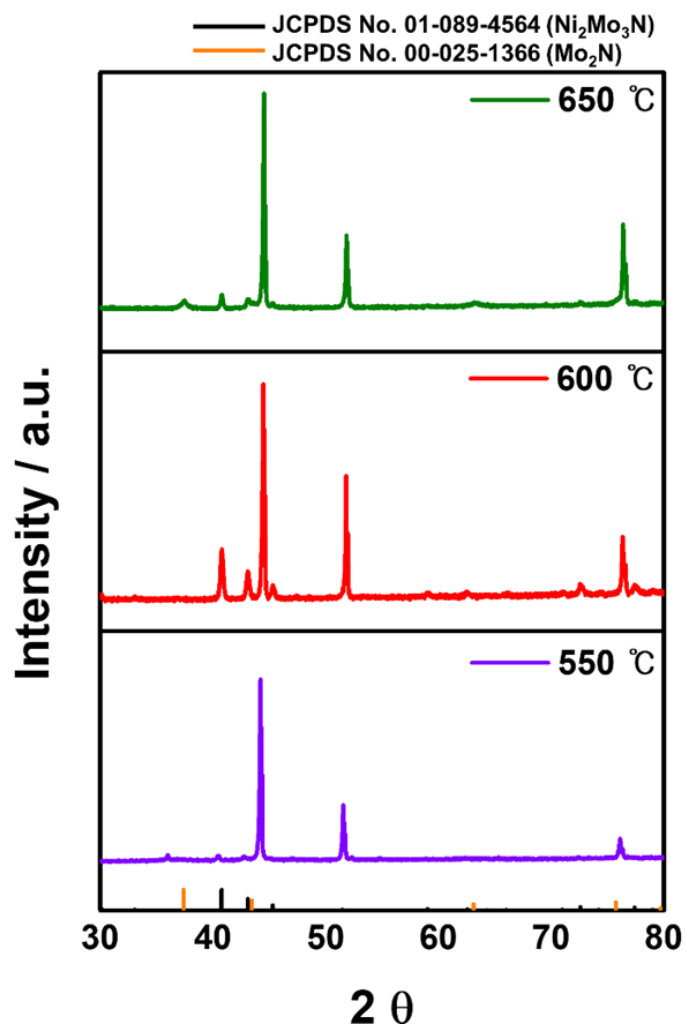

Figure S2. XRD patterns of prepared samples with various annealing temperatures.

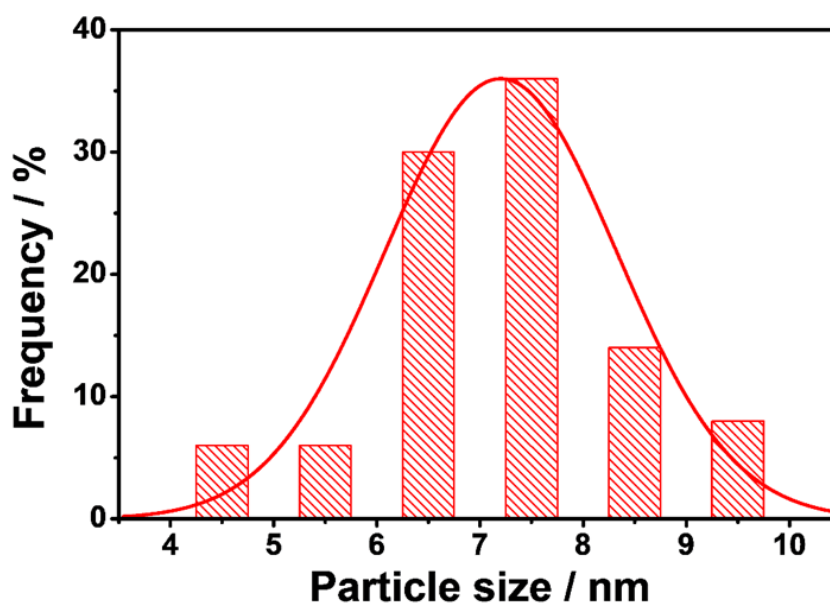

Figure S3. Histogram showing the particle size distribution of  $\text{Ni}_2\text{Mo}_3\text{N}$  nanoparticles from the TEM images.

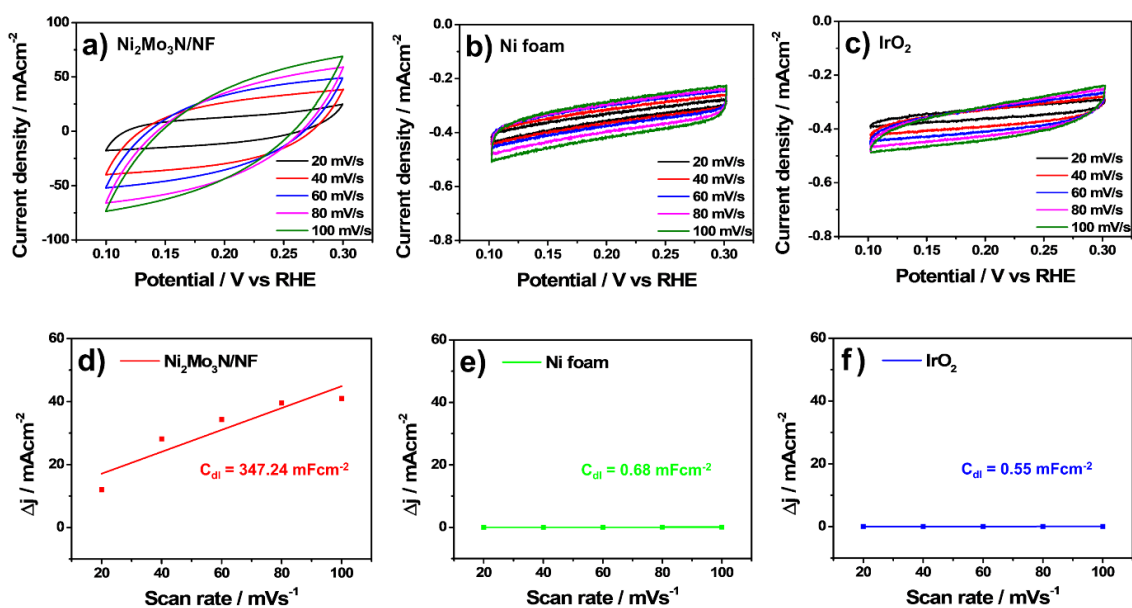

**Figure S4.** Cyclic voltammograms of a)  $\text{Ni}_2\text{Mo}_3\text{N/NF}$ , b) pristine Ni foam and c)  $\text{IrO}_2$  at different scan rates in 1.0 M KOH solution. d-f) The corresponding current density versus scan rate plots showing  $C_{dl}$  values for  $\text{Ni}_2\text{Mo}_3\text{N/NF}$ , pristine Ni foam and  $\text{IrO}_2$ .

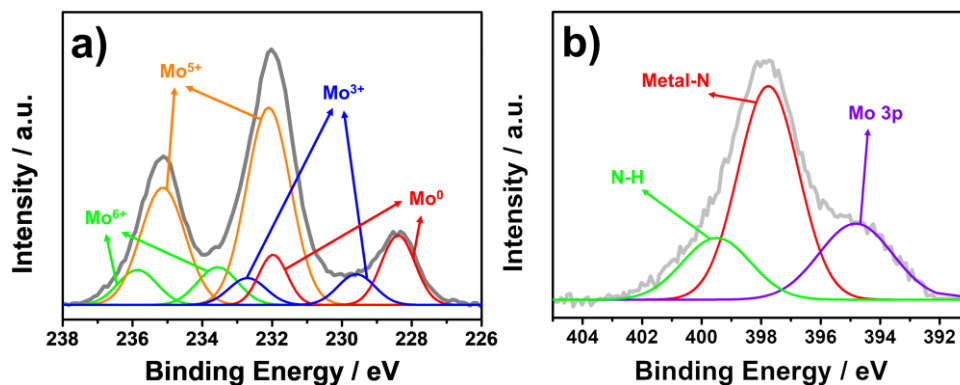

**Figure S5.** XPS spectra of  $\text{Ni}_2\text{Mo}_3\text{N/NF}$  after Ar-sputtering in the a) Mo 3d and b) N 1s, respectively.

**Table S1.** Comparison of OER performances in alkaline media with reported TMN-based catalysts.

| Catalyst                                           | $\eta_{10}$ (mV) | $\eta_{50}$ (mV) | $\eta_{100}$ (mV) | Electrolyte | Ref.      |
|----------------------------------------------------|------------------|------------------|-------------------|-------------|-----------|
| Ni <sub>2</sub> Mo <sub>3</sub> N/NF               |                  | 336.38           | 392.49            | 1 M KOH     | This work |
| Co-Mo <sub>2</sub> N                               | 302              | 400              | ≈ 485             | 1 M KOH     | [1]       |
| Ni/Ni <sub>0.2</sub> Mo <sub>0.8</sub> N@N-C       | 260              | ≈ 370            |                   | 1 M KOH     | [2]       |
| Zn-Ni <sub>3</sub> FeN/NG                          | 370              |                  |                   | 0.1 M KOH   | [3]       |
| NiMoN-550                                          | 295              | ≈ 365            | ≈ 390             | 1 M KOH     | [4]       |
| CuFeN/CNT                                          |                  | ≈ 375            | 392               | 1 M KOH     | [5]       |
| Ni <sub>3</sub> FeN-NPs                            | 241              | ≈ 340            | ≈ 430             | 1 M KOH     | [6]       |
| NiCoN/CC                                           | 360              | ≈ 400            |                   | 1 M NaOH    | [7]       |
| VN-Co-P                                            | 335              | ≈ 460            |                   | 1 M KOH     | [8]       |
| Ni <sub>3</sub> FeN                                | 355              | ≈ 560            |                   | 0.1 M KOH   | [9]       |
| NiCo-nitrides/NiCo <sub>2</sub> O <sub>4</sub> /GF | 183              | 344              | ≈ 430             | 1 M KOH     | [10]      |
| PF/Ni <sub>1.5</sub> Co <sub>1.5</sub> N           | 280              | ≈ 380            |                   | 1 M KOH     | [11]      |
| Co <sub>4</sub> N                                  | 330              | ≈ 375            |                   | 1 M KOH     | [12]      |

## References.

- Shi, X.; Wu, A.; Yan, H.; Zhang, L.; Tian, C.; Wang, L.; Fu, H. A “MOFs plus MOFs” strategy toward Co-Mo<sub>2</sub>N tubes for efficient electrocatalytic overall water splitting. *J. Mater. Chem. A* **2018**, *6*, 20100–20109.
- Li, T.; Hu, Y.; Pan, X.; Yin, J.; Li, Y.; Wang, Y.; Zhang, Y.; Sun, H.; Tang, Y. N-carbon supported hierarchical Ni/Ni<sub>0.2</sub>Mo<sub>0.8</sub>N nanosheets as high-efficiency oxygen evolution electrocatalysts. *Chem. Eng. J.* **2020**, *392*, 124845.
- He, X.; Tian, Y.; Huang, Z.; Xu, L.; Wu, J.; Qian, J.; Zhang, J.; Li, H. Engineering the electronic states of Ni<sub>3</sub>FeN via zinc ion regulation for promoting oxygen electrocatalysis in rechargeable Zn-air batteries. *J. Mater. Chem. A* **2021**, *9*, 2301–2307.
- Yin, Z.; Sun, Y.; Zhu, C.; Li, C.; Zhang, X.; Chen, Y. Bimetallic Ni-Mo nitride nanotubes as highly active and stable bifunctional electrocatalysts for full water splitting. *J. Mater. Chem. A* **2017**, *5*, 13648–13658.
- Choi, Y.; Kim, D.; Lin, L.; Yan, B.; Hong, H.; Qin, X.; Piao, Y. CuFeN/CNT composite derived from kinetically modulated urchin-shaped MOF for highly efficient OER catalysis. *Electrochim. Acta* **2021**, *389*, 138637.
- Chen, Q.; Wang, R.; Yu, M.; Zeng, Y.; Lu, F.; Kuang, X.; Lu, X. Bifunctional iron-nickel nitride nanoparticles as flexible and robust electrode for overall water splitting. *Electrochim. Acta* **2017**, *247*, 666–673.
- Han, L.; Feng, K.; Chen, Z. Self-supported cobalt nickel nitride nanowires electrode for overall electrochemical water splitting. *Energy Technol.* **2017**, *5*, 1908–1911.
- Yang, H.; Hu, Y.; Huang, D.; Xiong, T.; Li, M.; Balogun, M.-S.; Tong, Y. Efficient hydrogen and oxygen evolution electrocatalysis by cobalt and phosphorus dual-doped vanadium nitride nanowires. *Mater. Today Chem.* **2019**, *11*, 1–7.
- Fu, G.; Cui, Z.; Chen, Y.; Xu, L.; Tang, Y.; Goodenough, J. B. Hierarchically mesoporous nickel-iron nitride as a cost-efficient and highly durable electrocatalyst for Zn-air battery. *Nano Energy* **2017**, *39*, 77–85.
- Liu, Z.; Tan, H.; Liu, D.; Liu, X.; Xin, J.; Xie, J.; Zhao, M.; Song, L.; Dai, L.; Liu, H. Promotion of overall water splitting activity over a wide pH range by interfacial electrical effects of metallic NiCo-nitrides nanoparticle/NiCo<sub>2</sub>O<sub>4</sub> nanoflake/graphite fibers. *Adv. Sci.* **2019**, *6*, 1801829.
- Bai, X.; Wang, Q.; Xu, G.; Ning, Y.; Huang, K.; He, F.; Wu, Z. j.; Zhang, J. Phosphorus and fluorine Co-doping induced enhancement of oxygen evolution reaction in bimetallic nitride nanorods arrays: Ionic liquid-driven and mechanism clarification. *Chem. Eur. J.* **2017**, *23*, 16862–16870.
- Chen, P.; Xu, K.; Tong, Y.; Li, X.; Tao, S.; Fang, Z.; Chu, W.; Wu, X.; Wu, C. Cobalt nitrides as a class of metallic electrocatalysts for the oxygen evolution reaction. *Inorg. Chem. Front.* **2016**, *3*, 236–242.
